# Supplementary material for: Changes in Air Quality, Meteorology and Energy Consumption during the COVID-19 Lockdown and Unlock Periods in India
Source: MDPI journal article supplement (doi:10.3390/air1020010), 2023-05-04
Supplement: s1 [file s1]

Archive with 1 entries (1 files):
- air-2225781-supplementary.pdf
