# Supplementary material for: Changes in Air Quality, Meteorology and Energy Consumption during the COVID-19 Lockdown and Unlock Periods in India
Source: MDPI journal article supplement (doi:10.3390/air1020010), 2023-05-04
Supplement: s1 [file s1 › air-2225781-supplementary.pdf]

## SUPPLEMENTARY DATA

---

**Table S1:** The states of India and the codes given in the figure (top panel).

| State Name        | Code |
|-------------------|------|
| Andhra Pradesh    | AP   |
| Arunachal Pradesh | AR   |
| Assam             | AS   |
| Bihar             | BR   |
| Chhattisgarh      | CT   |
| Delhi             | DL   |
| Goa               | GA   |
| Gujarat           | GJ   |
| Haryana           | HR   |
| Himachal Pradesh  | HP   |
| Jammu and Kashmir | JK   |
| Jharkhand         | JH   |
| Karnataka         | KA   |
| Kerala            | KL   |
| Madhya Pradesh    | MP   |
| Maharashtra       | MH   |
| Manipur           | MN   |
| Meghalaya         | MG   |
| Mizoram           | MZ   |
| Nagaland          | NL   |
| Odisha            | OR   |
| Punjab            | PB   |
| Rajasthan         | RJ   |
| Sikkim            | SK   |
| Tamil Nadu        | TN   |
| Telangana         | TS   |
| Tripura           | TR   |
| Uttar Pradesh     | UP   |
| Uttarakhand       | UT   |
| West Bengal       | WB   |

**Table S2:** Results of one-way ANOVA between considered air pollution and weather parameters such as black carbon (BC), temperature (T), precipitation (P), aerosol optical depth (AOD) and incoming solar radiation (here with ultraviolet radiation; UV) during lockdown period over India.

| BC - T   | Degree of Freedom | Sum of Square | Mean Square | F-Value | P-Value |
|----------|-------------------|---------------|-------------|---------|---------|
| T        | 1                 | 179.82        | 179.83      | 4222    | < 0.05  |
| Residual | 1462              | 62.67         | 0.04        |         |         |
| AOD - T  |                   |               |             |         |         |
| T        | 1                 | 0.004         | 0.0044      | 1.989   | 0.16    |
| Residual | 1462              | 3.201         | 0.0023      |         |         |
| AOD - P  |                   |               |             |         |         |
| P        | 1                 | 0.006         | 0.0063      | 2.868   | 0.09    |
| Residual | 1462              | 3.199         | 0.0023      |         |         |
| AOD - UV |                   |               |             |         |         |
| UV       | 1                 | 0.0827        | 0.083       | 38.72   | < 0.05  |
| Residual | 1462              | 3.12          | 0.002       |         |         |
| P - T    |                   |               |             |         |         |
| T        | 1                 | 0.061         | 0.062       | 14.51   | < 0.05  |
| Residual | 1462              | 6.175         | 0.004       |         |         |

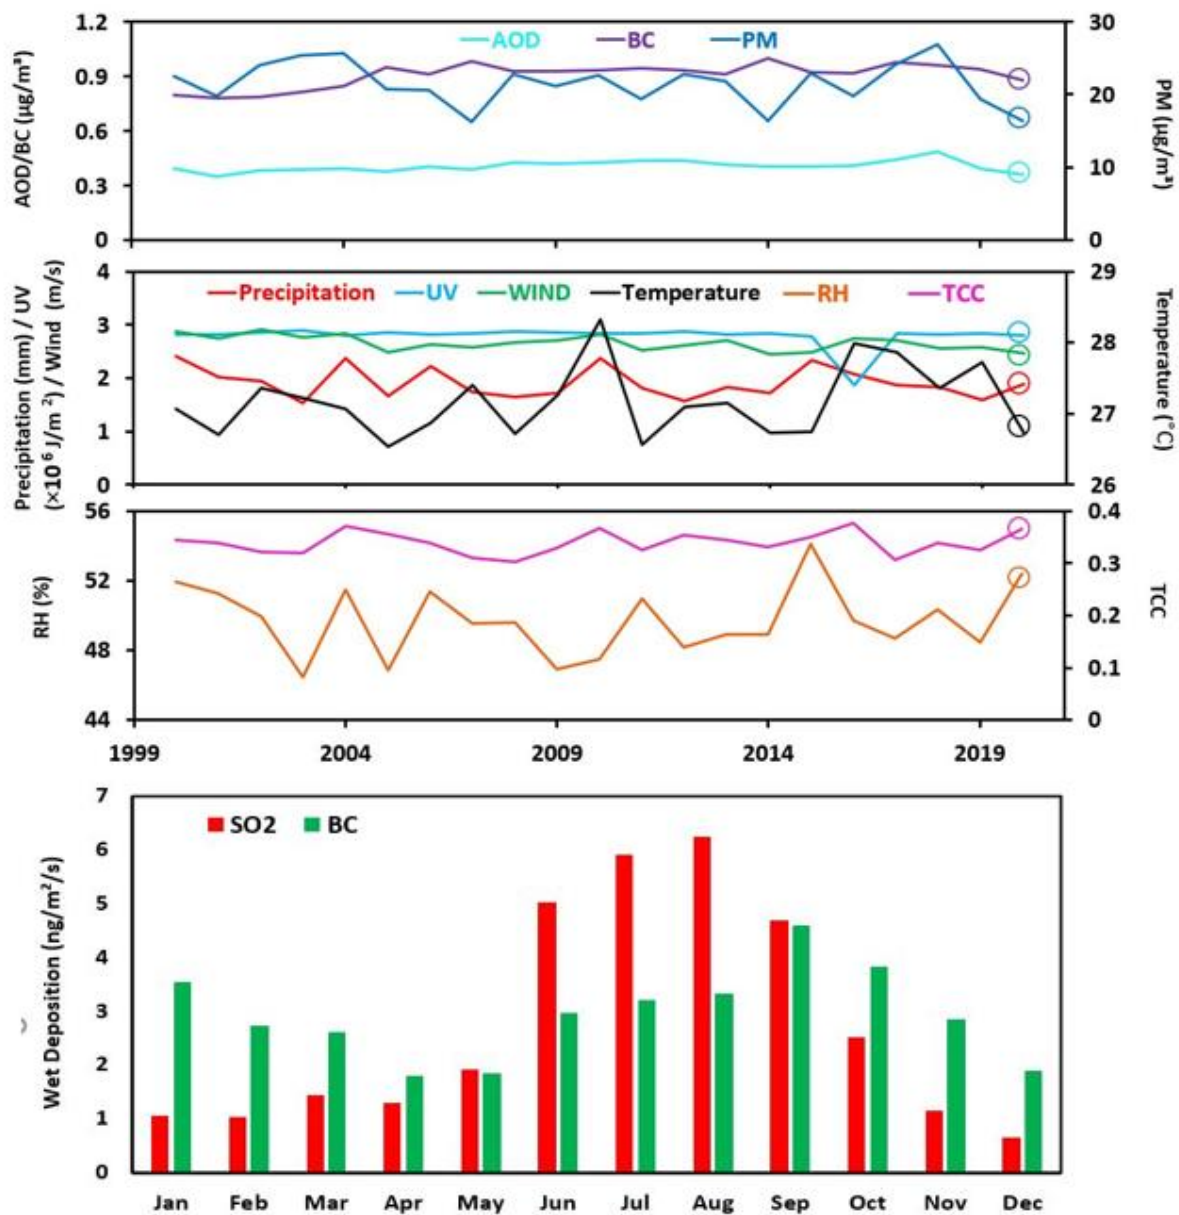

**Figure S1:** Temporal evolution of AOD, BC, Dust ( $\text{PM}_{2.5}$ ), precipitation, UV, winds, temperature, RH and TCC during the COVID-19 lockdown (LD) over India from 2000 to 2020. Circle marks the COVID-19 lockdown period. Bottom panel represents the wet deposition of  $\text{SO}_2$  and BC.

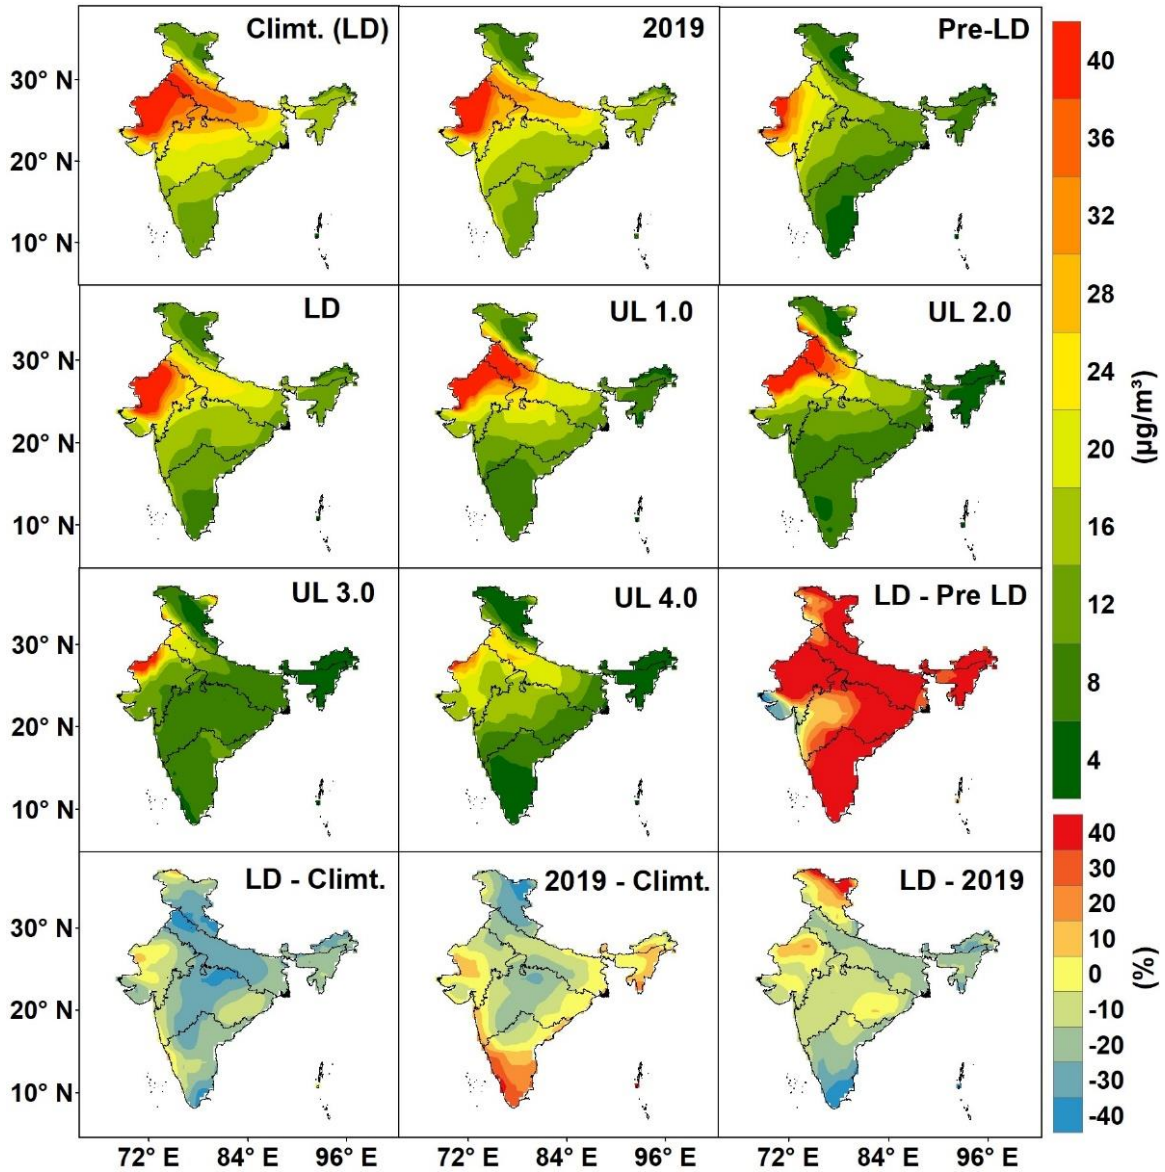

**Figure S2:** The average dust distribution over India during different periods: climatology of past 20 years corresponding to the lockdown period of 2020 (2000–2020, Climt. LD), 2019, pre-lockdown (pre-LD), lockdown (LD), and Unlock (UL 1.0, 2.0, 3.0 and 4.0) periods. The difference between dust concentration during lockdown and pre-lockdown (LD – Pre LD), climatology (LD – Climt.) and 2019 (LD – 2019), and the difference in dust concentration between 2019 and climatology of the past 20 years (2019 – Climt.).

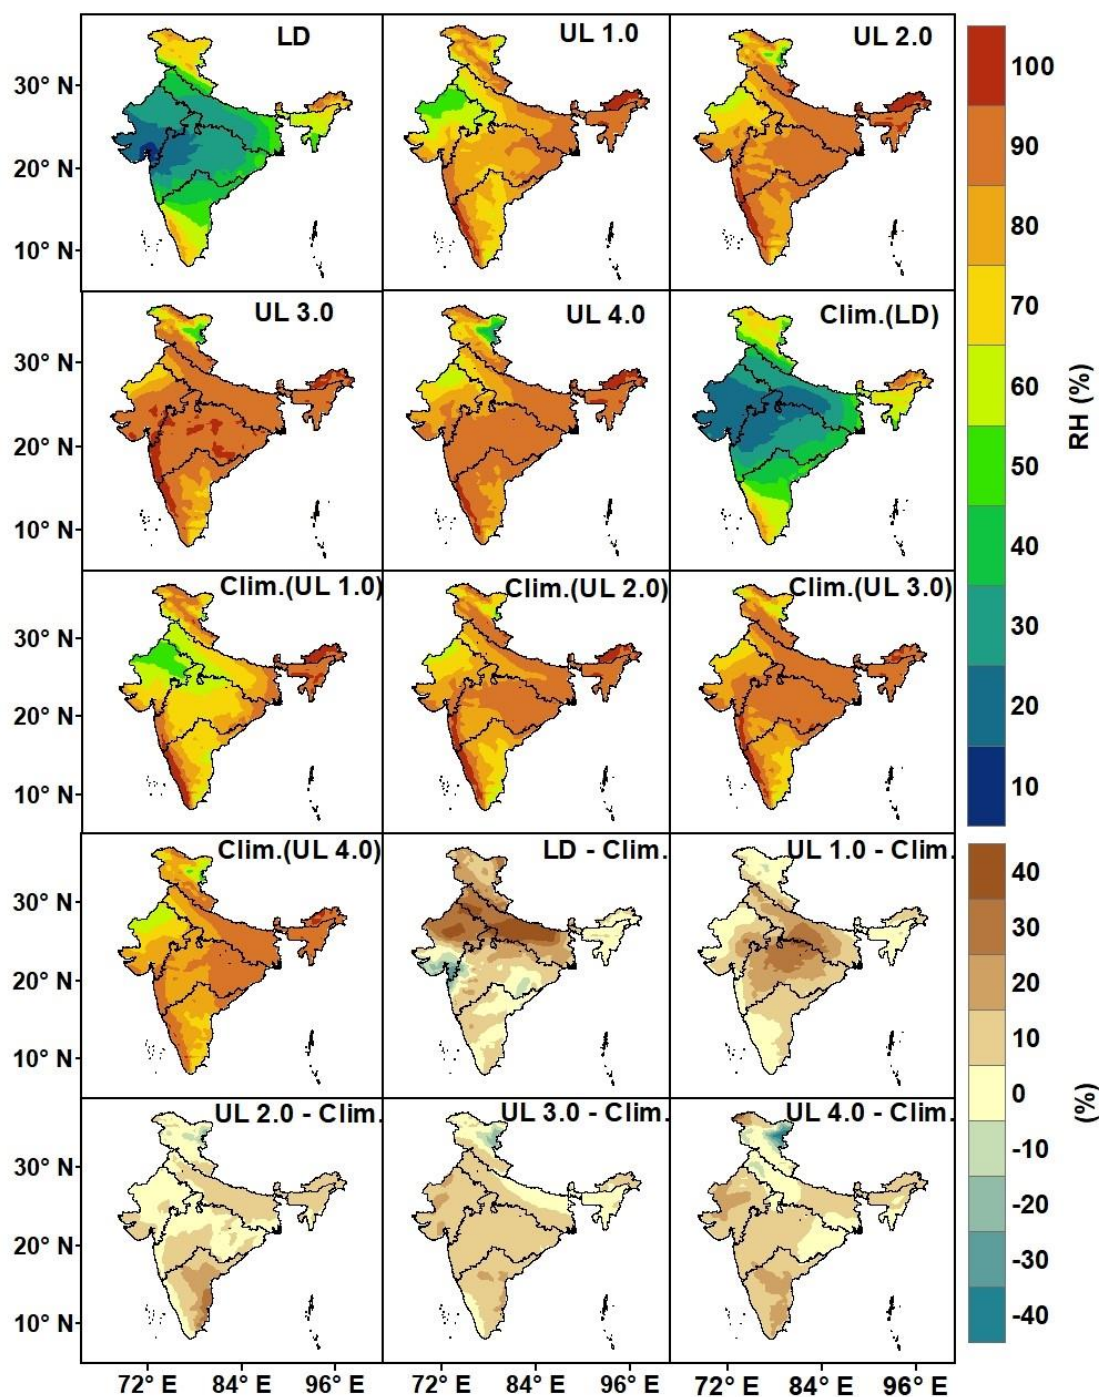

**Figure S3:** The average relative humidity (RH) distribution in India during different periods: lockdown (LD), and Unlock (UL 1.0, 2.0, 3.0 and 4.0), and climatology of past 30 years corresponding to the Unlock periods of 2020 [1990–2020, i.e. Clim. (UL 1.0)] periods. The difference in RH between lockdown and climatology (LD – Clim.) and Unlock periods (e.g. UL 1.0 – Clim.).



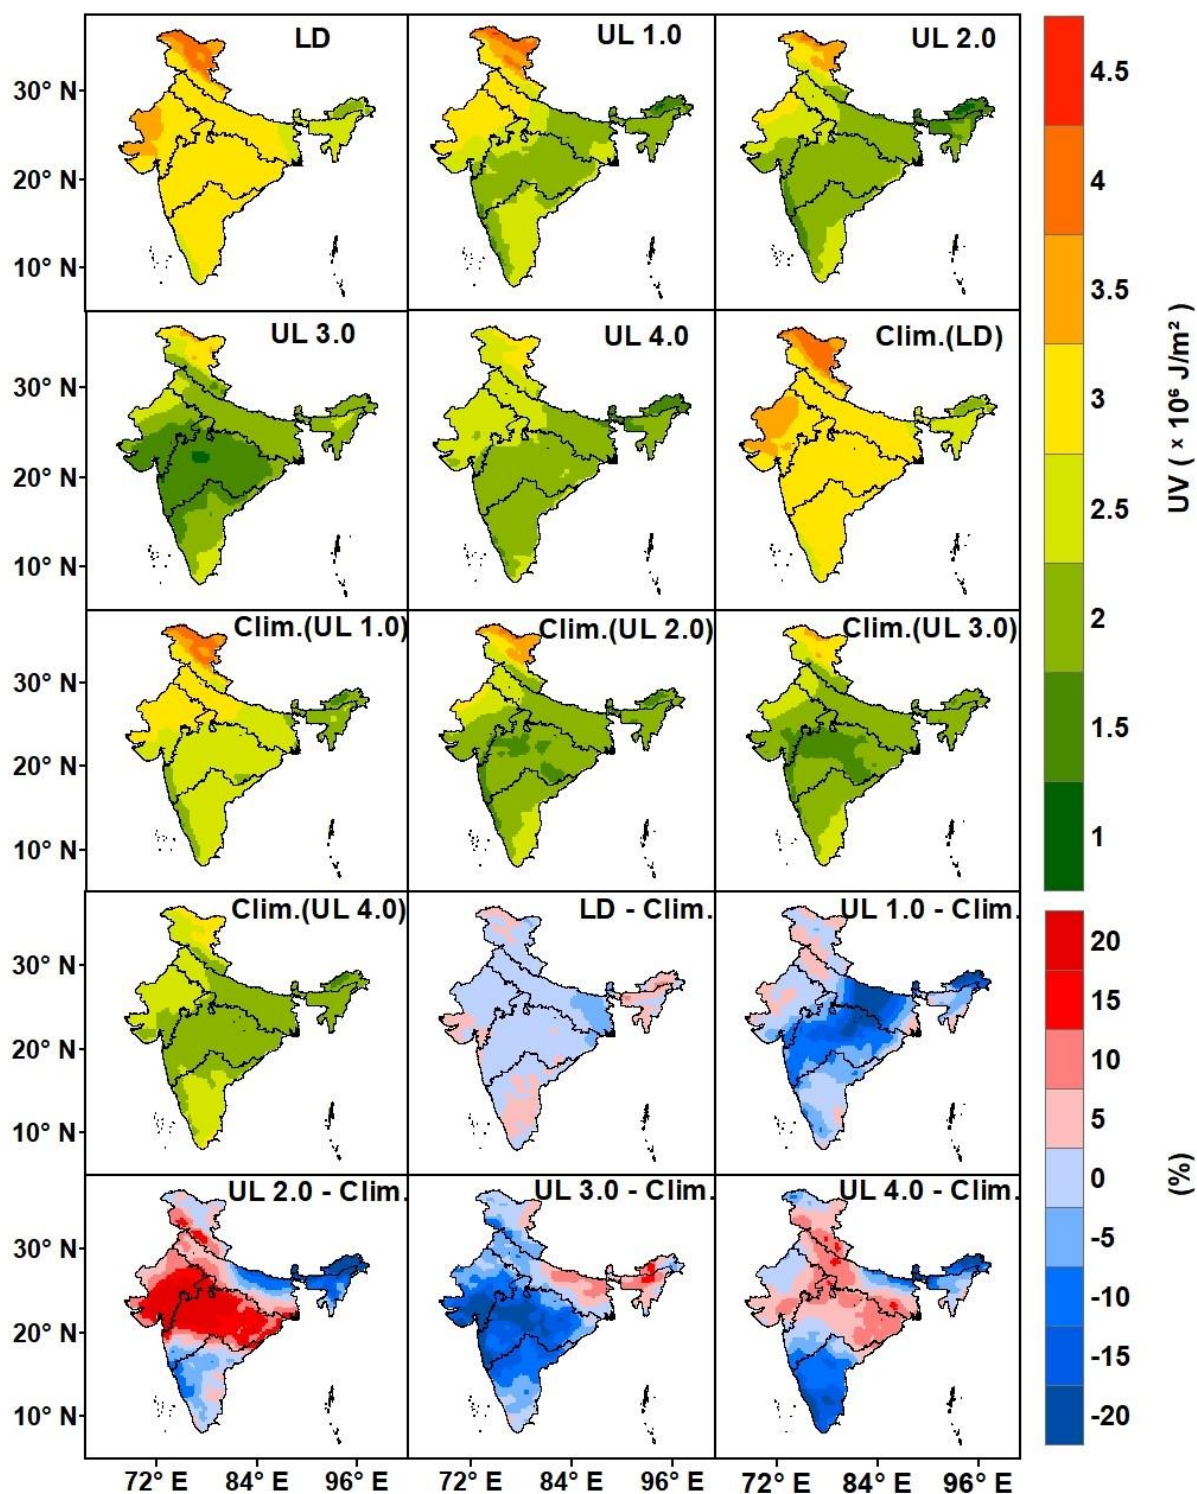

**Figure S5:** The average Ultra-Violet (UV) distribution in India during different periods: lockdown (LD), and Unlock (UL 1.0, 2.0, 3.0 and 4.0), and climatology of past 30 years corresponding to the Unlock periods of 2020 [1990–2020, i.e. Clim. (UL 1.0)] periods. The difference in UV between lockdown and climatology (LD – Clim.) and Unlock periods (e.g. UL 1.0 – Clim.).

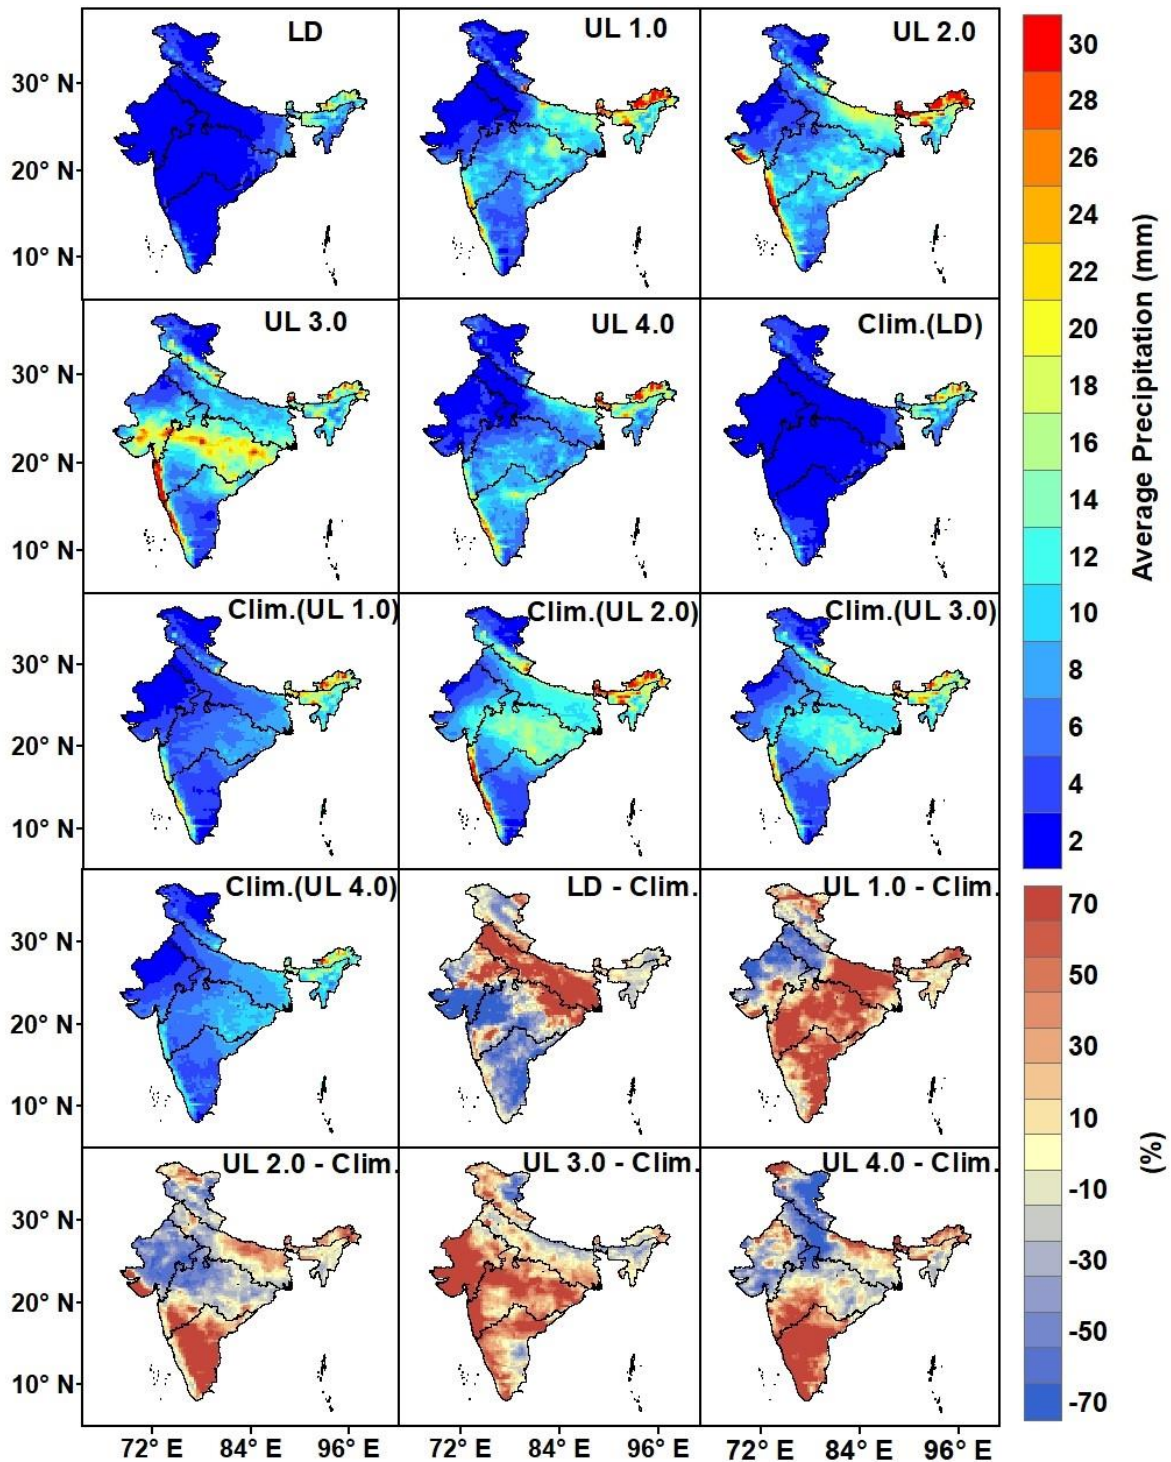

**Figure S6:** The average precipitation distribution in India during different periods: lockdown (LD), and Unlock (UL 1.0, 2.0, 3.0 and 4.0), and climatology of past 30 years corresponding to the Unlock periods of 2020 [1990–2020, i.e. Clim. (UL 1.0)] periods. The difference in precipitation between lockdown and climatology (LD – Clim.) and Unlock periods (e.g. UL 1.0 – Clim.).

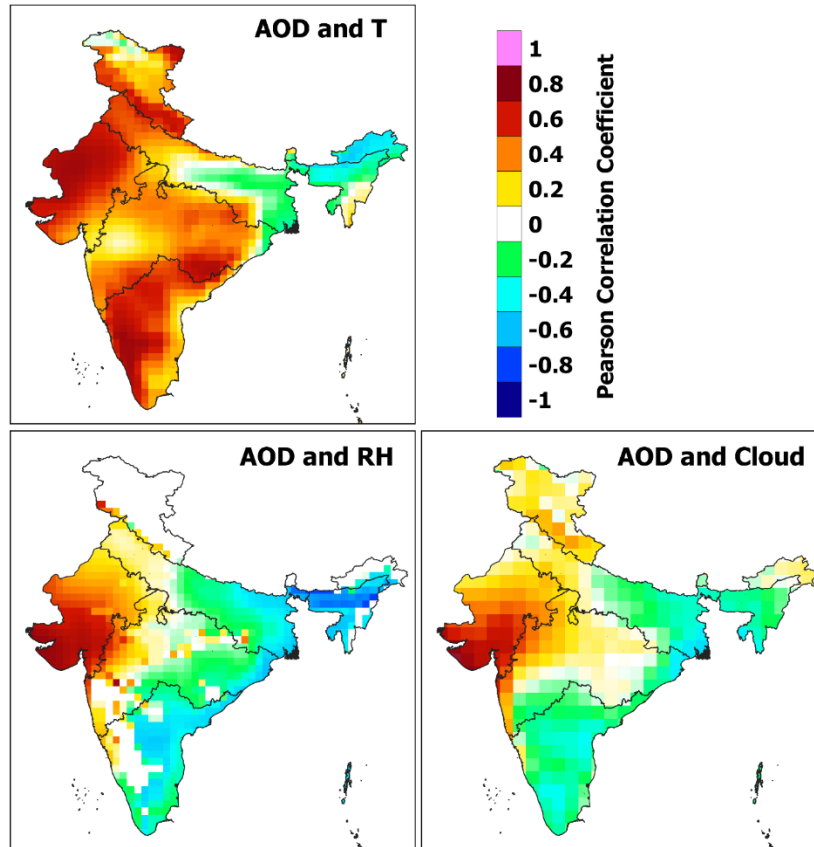

**Figure S7:** Pearson correlation analysis between aerosol optical depth (AOD) and relative humidity (RH), temperature (T) and cloud over India.

---
